4115

## Effect of alirocumab on recurrent cardiovascular events after acute coronary syndrome, according to the intensity of background statin treatment

R. Diaz<sup>1</sup>, Q.H. Li<sup>2</sup>, D.L. Bhatt<sup>3</sup>, V.A. Bittner<sup>4</sup>, M.T. Baccara-Dinet<sup>5</sup>, S.G. Goodman<sup>6</sup>, J.W. Jukema<sup>7</sup>, A. Parkhomenko<sup>8</sup>, R. Pordy<sup>2</sup>, Z. Reiner<sup>9</sup>, M. Szarek<sup>10</sup>, H.F. Tse<sup>11</sup>, A.M. Zeiher<sup>12</sup>, G.G. Schwartz<sup>13</sup>, P.G. Steg<sup>14</sup>

<sup>1</sup>Cardiology Studies Latin America, Rosario, Argentina; <sup>2</sup>Regeneron Pharmaceuticals, Tarrytown, United States of America; <sup>3</sup>Brigham and Womens Hospital, Boston, United States of America; <sup>4</sup>University of Alabama Birmingham, Birmingham, United States of America; <sup>5</sup>Sanofi, Montpellier, France; <sup>6</sup>University of Toronto, Toronto, Canada; <sup>7</sup>Leiden University Medical Center, Leiden, Netherlands (The); <sup>8</sup>M.D. Strazhesko Institute of Cardiology of AMS of Ukraine, Kiev, Ukraine; <sup>9</sup>University of Zagreb School of Medicine, Zagreb, Croatia; <sup>10</sup>SUNY Downstate Medical Center, Brooklyn, United States of America; <sup>11</sup>Queen Mary Hospital, Hong Kong, Hong Kong; <sup>12</sup>Wolfgang Goethe University, Frankfurt am Main, Germany; <sup>13</sup>University of Colorado, Aurora, United States of America; <sup>14</sup>Hospital Bichat-Claude Bernard, Paris, France  
On behalf of ODYSSEY OUTCOMES

**Funding Acknowledgement:** Funded by Sanofi and Regeneron Pharmaceuticals

**Background:** Statins are a cornerstone of therapy for coronary heart disease. We describe the effects of alirocumab (ALI) in patients (pts) with recent acute coronary syndrome (ACS) and dyslipidaemia per category of statin use.

**Methods:** ODYSSEY OUTCOMES compared ALI with placebo (PBO) in 18,924 pts with recent ACS and dyslipidaemia despite high-intensity/maximum tolerated statin (atorvastatin 40–80 mg/d or rosuvastatin 20–40 mg/d). Lower doses could be used if there were symptoms, laboratory abnormalities, or contraindications with higher doses. In cases of documented intolerance to  $\geq 2$  statins, pts could qualify on no statin treatment. Pts were randomized to ALI (75 mg SC Q2W, with possible up-titration to 150 mg Q2W) or PBO. Median follow-up was 2.8 years. Primary endpoint was major adverse cardiovascular events (MACE: CHD death, non-fatal MI, ischaemic stroke, or unstable angina requiring hospitalization). Pts were categorized by statin therapy at baseline: high intensity (88.8%), low or moderate intensity (8.7%), or no statin use (2.4%). In each category

we determined the relative (hazard ratio [HR]) and absolute risk reductions (ARR) for MACE with ALI.

**Results:** Overall, ALI reduced MACE (HR 0.85, 95% CI 0.78–0.93;  $P < 0.001$ ). HRs were consistent across statin categories (Table). Baseline LDL-C increased across high-intensity, low/moderate-intensity, and no statin categories. Correspondingly, there was a gradient of the risk of MACE in the PBO group across these categories (10.8%, 10.7%, and 26%). With ALI treatment, the mean reduction in LDL-C from baseline to Month 4 increased across the 3 statin categories and correspondingly the ARRs for MACE were 1.3%, 3.2%, and 8.0% ( $P$  interaction  $< 0.001$ ).

**Conclusions:** In ODYSSEY OUTCOMES, patients unable to receive high-intensity statin treatment showed greater ARRs with ALI, consistent with higher baseline LDL-C concentration and greater absolute LDL-C reduction. Patients unable to receive high-intensity statin treatment are an important group to consider for treatment with ALI after ACS.

LDL-C values and MACE events

|                                                                | All patients<br>N=18,924 (100%) |              | High-intensity statin<br>N=16,811 (88.8%) |              | Low-/moderate-intensity statin<br>N=1653 (8.7%) |              | No statin<br>N=460 (2.4%) |              | Interaction P-value<br>(treatment x statin<br>category) |
|----------------------------------------------------------------|---------------------------------|--------------|-------------------------------------------|--------------|-------------------------------------------------|--------------|---------------------------|--------------|---------------------------------------------------------|
|                                                                | PBO (N=9462)                    | ALI (N=9462) | PBO (N=8431)                              | ALI (N=8380) | PBO (N=804)                                     | ALI (N=849)  | PBO (N=227)               | ALI (N=233)  |                                                         |
| LDL-C at baseline, mmol/L, mean (SE)*                          | 2.39 (0.01)                     | 2.39 (0.01)  | 2.35 (0.01)                               | 2.35 (0.01)  | 2.41 (0.03)                                     | 2.43 (0.03)  | 3.76 (0.08)               | 3.82 (0.08)  |                                                         |
| Change in LDL-C from baseline to Month 4,<br>mmol/L, mean (SE) | 0.03 (0.01)                     | -1.4 (0.01)  | 0.03 (0.01)                               | -1.37 (0.01) | 0.01 (0.02)                                     | -1.47 (0.02) | -0.004 (0.06)             | -2.27 (0.06) | <0.001                                                  |
| MACE, n (%)*                                                   | 1052 (11.1)                     | 903 (9.5)    | 907 (10.8)                                | 797 (9.5)    | 86 (10.7)                                       | 64 (7.5)     | 59 (26.0)                 | 42 (18.0)    |                                                         |
| HR (95% CI)                                                    | 0.85 (0.78–0.93)                |              | 0.88 (0.80–0.96)                          |              | 0.69 (0.50–0.95)                                |              | 0.65 (0.43–0.96)          |              | 0.14                                                    |
| ARR (%) (95% CI)                                               | 1.6 (0.7–2.4)                   |              | 1.3 (0.3–2.2)                             |              | 3.2 (0.4–5.9)                                   |              | 8.0 (0.4–15.5)            |              | <0.001                                                  |

\* $P < 0.001$  for difference among statin categories.
